# Supplementary material for: Amphiphilic and magnetic behavior of Fe3O4 nanocrystals
Source: Royal Society of Chemistry journal article supplement (doi:10.1039/b917276a), 2010-01-01
Supplement: b917276a.pdf [file b917276a.pdf]

**Amphiphilic and magnetic behavior of Fe<sub>3</sub>O<sub>4</sub> nanocrystals**

Wladimir Thiessen, Aliaksei Dubavik, Vladimir Lesnyak, Nikolai Gaponik, Alexander Eychmüller and Thomas Wolff\*

Physikalische Chemie, Technische Universität Dresden, D-01062 Dresden, Germany.

Fax: +49(0)35146333391; Tel: +49(0)35146333633; E-mail: [thomas.wolff@chemie.tu-dresden.de](mailto:thomas.wolff@chemie.tu-dresden.de)

- 1) Preparation of magnetite nanocrystals
- 2) Dynamic light scattering of nanocrystals
- 3) GPC of the stabilizing polymer

1) Preparation of nanocrystals

Nanoscale iron oxide was prepared (following Asher et al.<sup>1</sup>) by the coprecipitation of ferric and ferrous ions in ammonium hydroxide solution. A 10.8 g portion of  $\text{FeCl}_3 \cdot 6\text{H}_2\text{O}$  (J. T. Baker) and 4.0 g of  $\text{FeCl}_2 \cdot 4\text{H}_2\text{O}$  (Sigma) were dissolved in 50 mL of water. The resulting solution was poured with vigorous stirring into 500 mL of a 1.0 M  $\text{NH}_4\text{OH}$  solution. The resulting black precipitate was collected with a magnet. A 500 mL portion of 1 M tetramethylammonium hydroxide (Aldrich) solution was added to the precipitate, and the mixture was sonicated for 1 h. After that, 1 g of our stabilizing polymer per 1 g precipitate was added. The product was separated by means of a magnet, washed with methanol and dried in a desiccator.

2) Dynamic light scattering of nanocrystals

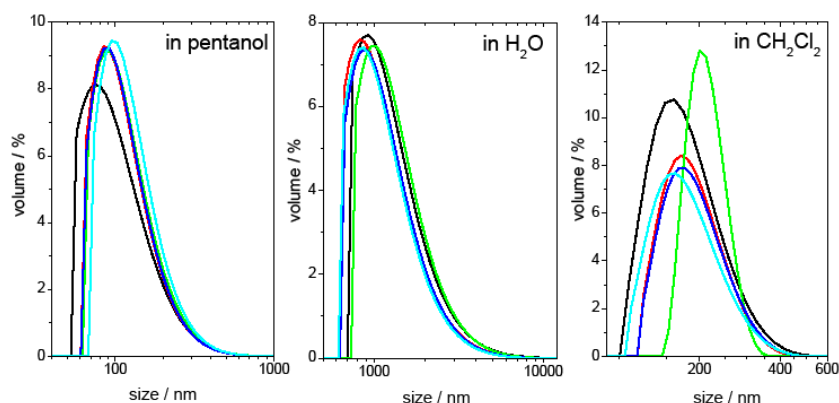

Figure S1. DLS-graphs of magnetite nanocrystals in three solvents; “size” in the diagrams is solvodynamic diameter

Table S1. Results of DLS measurements of magnetite nanoparticles in different solvents

| Measurement | Solvodynamic diameter, nm           |                                                 |                                                     |
|-------------|-------------------------------------|-------------------------------------------------|-----------------------------------------------------|
|             | $\text{Fe}_3\text{O}_4$ in pentanol | $\text{Fe}_3\text{O}_4$ in $\text{H}_2\text{O}$ | $\text{Fe}_3\text{O}_4$ in $\text{CH}_2\text{Cl}_2$ |
| 1           | 231                                 | 3054                                            | 224                                                 |
| 2           | 228                                 | 2467                                            | 224                                                 |
| 3           | 217                                 | 2747                                            | 229                                                 |
| 4           | 220                                 | 2364                                            | 232                                                 |
| 5           | 224                                 | 2616                                            | 227                                                 |
| average     | <b>224</b>                          | <b>2650</b>                                     | <b>227</b>                                          |

- 3) Gel permeation chromatogram of the stabilizing polymer obtained using poly4-vinylpyridine as a standard.

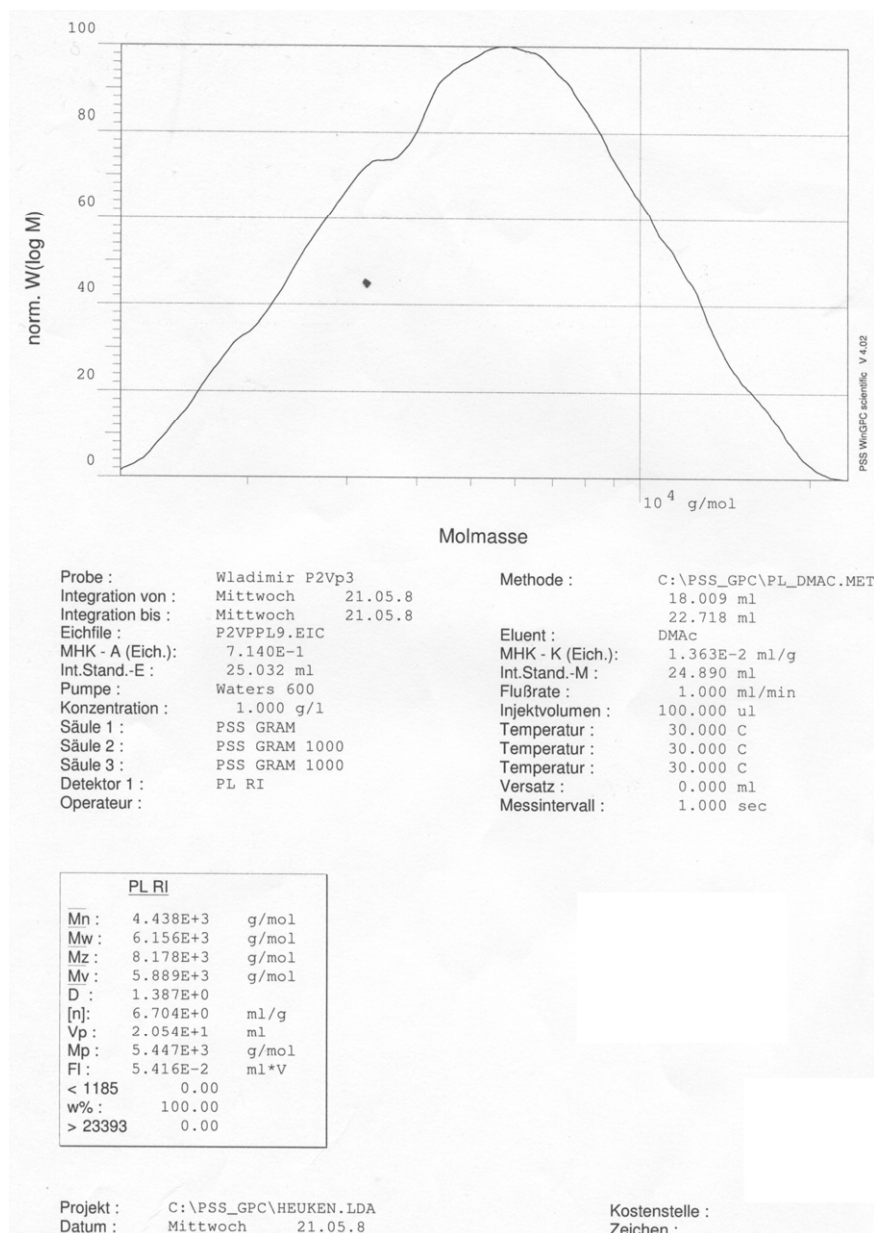

Figure S2: GPC of the stabilizing polymer prepared via controlled radical copolymerization of 4-vinylpyridine (60 mmol), monomer 2 (10 mmol), monomer 3 (15 mmol) and monomer 4 (15 mmol) using TIPNO-alkoxyamine (2,2,5-trimethyl-4-phenyl-3-azahexane-3-nitroxide, 1 mmol) as the initiator.<sup>2</sup>

## References

- (1) Xu, X.; Friedman, G.; Humfield, K. D.; Majetich, S. A.; Asher, S. A. *Chem. Mater.* 2002, **14**, 1249–1256.
- (2) D. Benoit, V. Chaplinski, R. Braslau, C. J. Hawker, *J. Am. Chem. Soc.* 1999, **121**, 3904.
